# Supplementary material
Source: PubMed Central journal article supplement (PMC11030554)
Supplement: 262_2010_846_MOESM1_ESM.pdf [file 262_2010_846_MOESM1_ESM.pdf]

## Supplementary figure 1

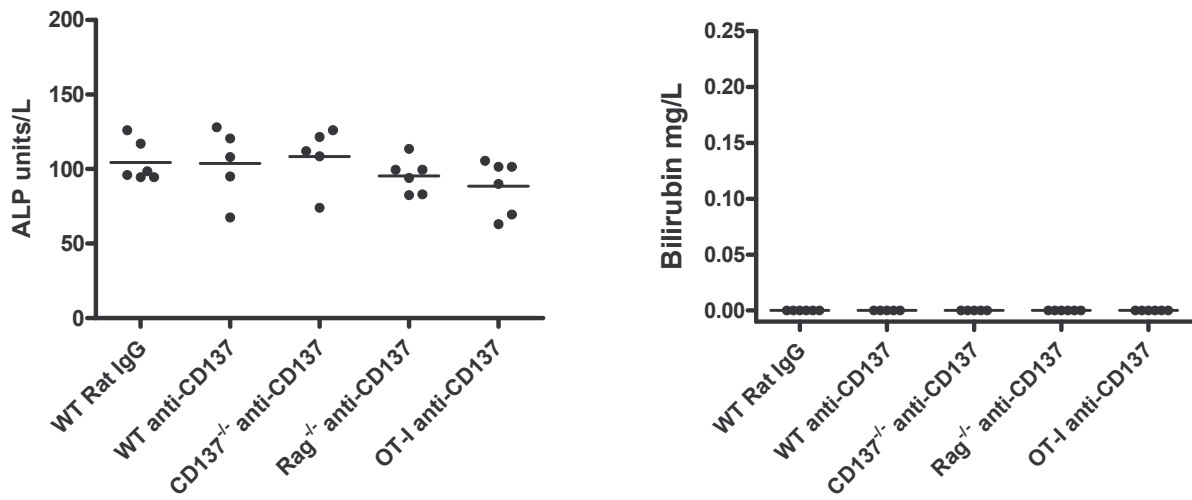

**Supplementary figure 1.** Determination of alkaline phosphatase and total bilirubin in the samples from figure 2.

## Supplementary figure 2

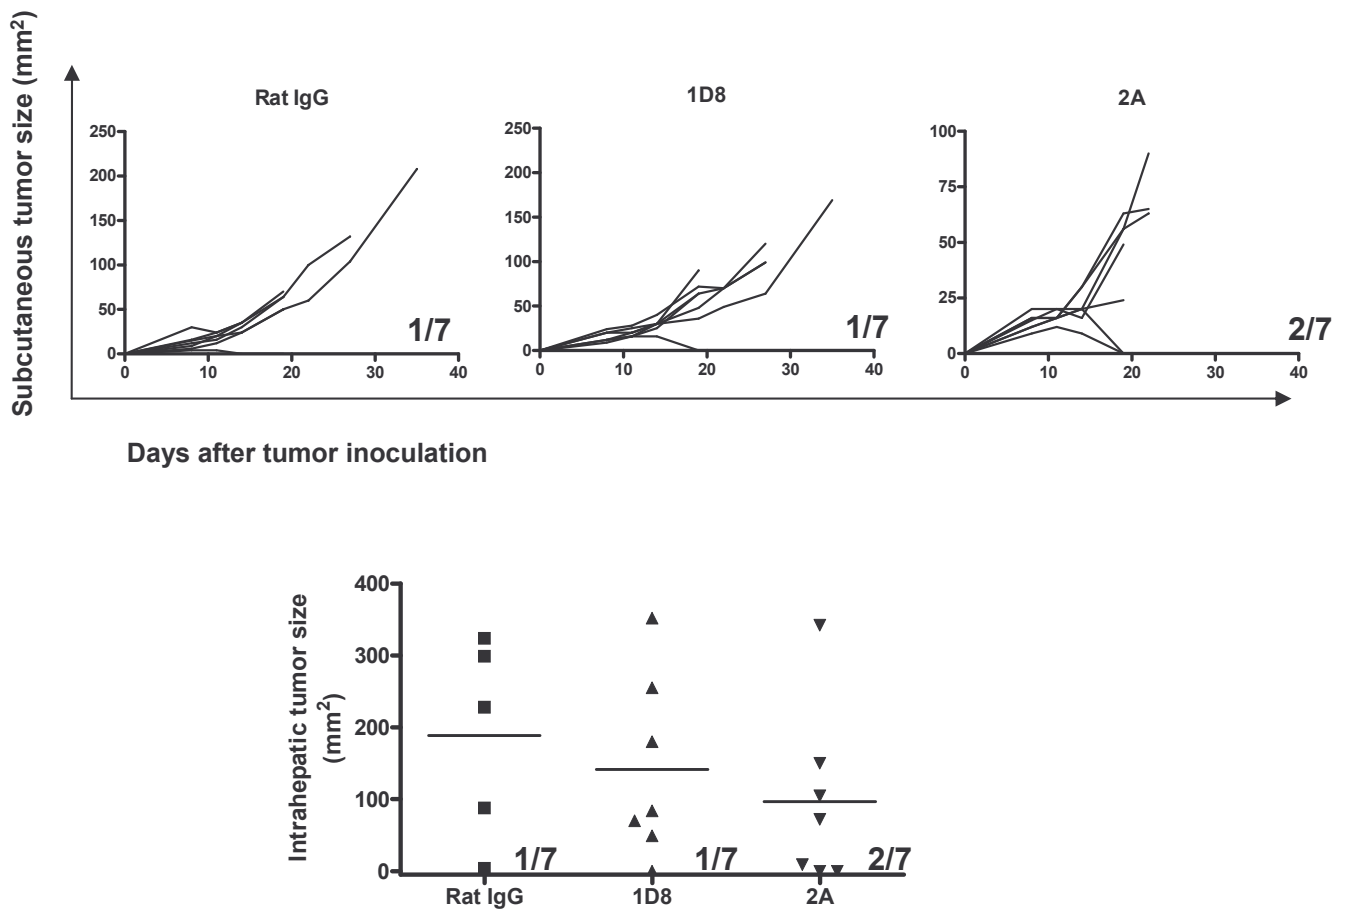

**Supplementary figure 2.** Experiments as those in figure 5 but in this case mice were simultaneously implanted with  $5 \times 10^5$  MC38 in the middle lobe of the liver and in the subcutaneous flank. Subcutaneous tumors were monitored biweekly (upper graphs) and the liver tumor inspected on day 19 after tumor cell inoculation by exploratory laparotomy (lower graph).

### Supplementary figure 3

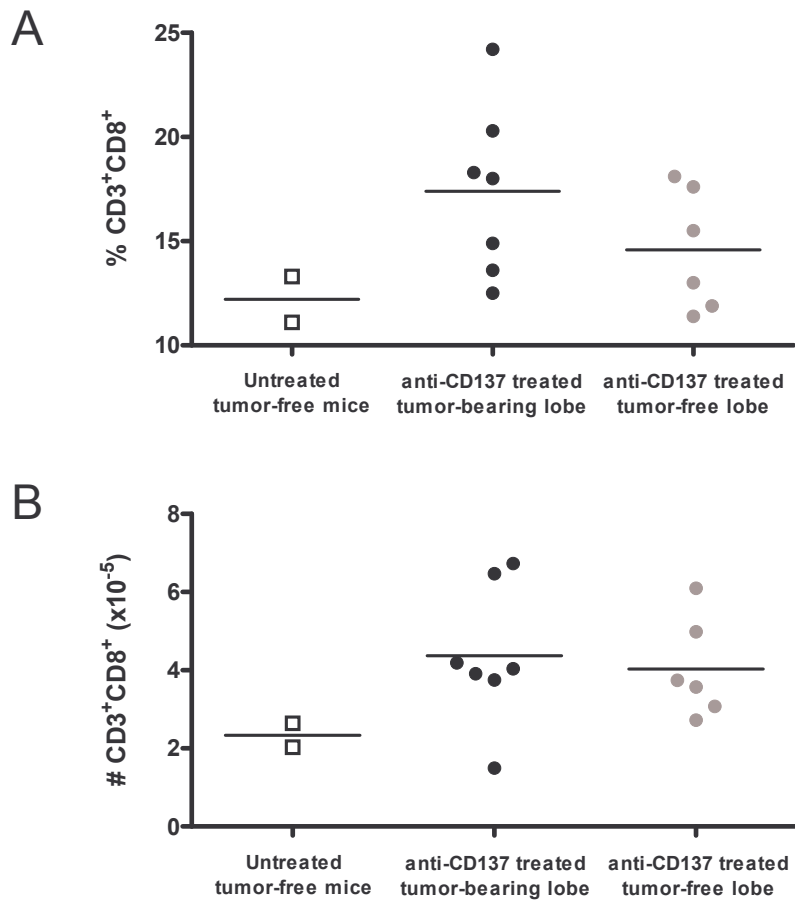

**Supplementary figure 3.** Mice were implanted with  $5 \times 10^5$  MC38 in the middle lobe of the liver treated with three doses of  $150 \mu\text{g}$  of anti-CD137 mAb. Liver leukocytes were purified with a percoll gradients as in figure 3. Percentages (A) and absolute numbers (B) of recovered liver CD3<sup>+</sup> CD8<sup>+</sup> in both tumor-bearing and tumor-free lobes are shown.
